# Supplementary material for: Design, Synthesis and Biological Evaluation of Novel Pyrazolo[1,2,4]triazolopyrimidine Derivatives as Potential Anticancer Agents
Source: MDPI journal article supplement (doi:10.3390/molecules26134065), 2021-07-02
Supplement: s1 [file s1]

# Supplementary data

for

## Design, Synthesis and Biological Evaluation of Novel Pyrazolo[1,2,4]triazolopyrimidine Derivatives as Potential Anticancer Agents

Saeb Aliwaini <sup>1</sup>, Bassam Abu Thaher <sup>2,\*</sup>, Ihab Al-Masri <sup>3</sup>, Nabil Shurrah <sup>4</sup>, Said El-Kurdi <sup>2</sup>, Dieter Schollmeyer <sup>5</sup>, Basem Qeshta <sup>2</sup>, Mariam Ghunaim <sup>1</sup>, René Csuk <sup>6</sup>, Stefan Laufer <sup>7</sup>, Lars Kaiser <sup>8,9</sup> and Hans-Peter Deigner <sup>8,10,11,\*</sup>

<sup>1</sup> Department of Biology and Biotechnology, Islamic University of Gaza, Gaza PO Box 108, Palestine; siwini@iugaza.edu.ps (S.A.); mghunaim92@gmail.com (M.G.)

<sup>2</sup> Faculty of Science, Chemistry Department, Islamic University of Gaza, Gaza P.O. Box 108, Palestine; skurdi@iugaza.edu.ps (S.E.-K.); basemsq@yahoo.com (B.Q.)

<sup>3</sup> Faculty of Pharmacy, Al-Azhar University, Palestine; ihabalmasri@yahoo.com

<sup>4</sup> Chemistry Department, Al Azhar University-Gaza, Gaza, Palestine; nabilkhsh139@yahoo.com

<sup>5</sup> Department of Organic Chemistry, Johannes Gutenberg-University Mainz, Duesbergweg 10-14, 55099 Mainz, Germany; scholli@uni-mainz.de

<sup>6</sup> Department of Organic Chemistry, Martin-Luther-University Halle-Wittenberg, Kurt-Mothes-Str. 2, 06120 Halle (Saale), Germany; rene.csuk@chemie.uni-halle.de

<sup>7</sup> Department of Pharmaceutical Chemistry, Pharmaceutical Institute, University of Tuebingen, Auf der Morgenstelle 8, 72076 Tuebingen, Germany; stefan.laufer@uni-tuebingen.de

<sup>8</sup> Faculty of Medical and Life Sciences, Institute of Precision Medicine, Furtwangen University (HFU), Jakob-Kienzle-Strasse 17, 78054 Villingen-Schwenningen, Germany; kal@hs-furtwangen.de

<sup>9</sup> Institute of Pharmaceutical Sciences, University of Freiburg, Albertstraße 25, 79104 Freiburg i. Br., Germany

<sup>10</sup> EXIM Department, Fraunhofer Institute IZI Leipzig, Schillingallee 68, 18057 Rostock, Germany

<sup>11</sup> Associated member of Faculty of Science, Tuebingen University, Auf der Morgenstelle 8, 72076 Tübingen, Germany

\* Correspondence: Hans-Peter.Deigner@hs-furtwangen.de (H.-P.D.); bthaher@iugaza.edu.ps (B.A.T.); Tel.: +49-7720-307-4232 (H.-P.D.); +970-8-264-4400 (B.A.T)

**Table S1.** Selected bond lengths and angles Geometric parameters (Å, °)

|                  |           |              |           |
|------------------|-----------|--------------|-----------|
| Br1A—C16A        | 1.909(7)  | C7B—H7B      | 0.9500    |
| N1A—C2A          | 1.355(8)  | N8B—C9B      | 1.314(8)  |
| N1A—N12A         | 1.355(7)  | C9B—C10B     | 1.435(9)  |
| N1A—C13A         | 1.437(8)  | C10B—C11B    | 1.412(9)  |
| C2A—N3A          | 1.374(8)  | C11B—N12B    | 1.335(8)  |
| C2A—C10A         | 1.383(8)  | C11B—C19B    | 1.463(9)  |
| N3A—C4A          | 1.292(8)  | C13B—C14B    | 1.380(9)  |
| C4A—N5A          | 1.377(8)  | C13B—C18B    | 1.388(9)  |
| C4A—H4A          | 0.9500    | C14B—C15B    | 1.379(9)  |
| N5A—C9A          | 1.363(8)  | C14B—H14B    | 0.9500    |
| N5A—N6A          | 1.386(8)  | C15B—C16B    | 1.385(9)  |
| N6A—C7A          | 1.289(9)  | C15B—H15B    | 0.9500    |
| C7A—N8A          | 1.370(9)  | C16B—C17B    | 1.366(9)  |
| C7A—H7A          | 0.9500    | C17B—C18B    | 1.392(9)  |
| N8A—C9A          | 1.321(8)  | C17B—H17B    | 0.9500    |
| C9A—C10A         | 1.431(9)  | C18B—H18B    | 0.9500    |
| C10A—C11A        | 1.418(8)  | C19B—C20B    | 1.389(9)  |
| C11A—N12A        | 1.329(8)  | C19B—C24B    | 1.394(9)  |
| C11A—C19A        | 1.464(9)  | C20B—C21B    | 1.351(10) |
| C13A—C18A        | 1.381(9)  | C20B—H20B    | 0.9500    |
| C13A—C14A        | 1.402(9)  | C21B—N22B    | 1.336(9)  |
| C14A—C15A        | 1.375(9)  | C21B—H21B    | 0.9500    |
| C14A—H14A        | 0.9500    | N22B—C23B    | 1.338(9)  |
| C15A—C16A        | 1.392(10) | N22B—H22B    | 0.92(8)   |
| C2A—N1A—<br>N12A | 111.3(5)  | N8B—C9B—C10B | 135.2(6)  |
| C2A—N1A—<br>C13A | 129.0(5)  | N5B—C9B—C10B | 114.4(6)  |

|                   |          |                |          |
|-------------------|----------|----------------|----------|
| N12A—N1A—<br>C13A | 119.7(5) | C2B—C10B—C11B  | 105.6(5) |
| N1A—C2A—<br>N3A   | 124.0(6) | C2B—C10B—C9B   | 115.1(6) |
| N1A—C2A—<br>C10A  | 107.2(5) | C11B—C10B—C9B  | 139.0(6) |
| N3A—C2A—<br>C10A  | 128.8(6) | N12B—C11B—C10B | 109.9(5) |
| C4A—N3A—<br>C2A   | 114.0(6) | N12B—C11B—C19B | 117.7(6) |
| N3A—C4A—<br>N5A   | 121.7(6) | C10B—C11B—C19B | 132.4(6) |
| N3A—C4A—<br>H4A   | 119.100  | C11B—N12B—N1B  | 106.5(5) |
| N5A—C4A—<br>H4A   | 119.100  | C14B—C13B—C18B | 121.1(6) |
| C9A—N5A—<br>C4A   | 126.1(6) | C14B—C13B—N1B  | 121.2(6) |
| C9A—N5A—<br>N6A   | 108.6(5) | C18B—C13B—N1B  | 117.6(6) |
| C4A—N5A—<br>N6A   | 125.4(6) | C15B—C14B—C13B | 119.8(6) |
| C7A—N6A—<br>N5A   | 102.0(6) | C15B—C14B—H14B | 120.100  |
| N6A—C7A—<br>N8A   | 117.1(7) | C13B—C14B—H14B | 120.100  |
| N6A—C7A—<br>H7A   | 121.400  | C14B—C15B—C16B | 119.0(6) |
| N8A—C7A—<br>H7A   | 121.400  | C14B—C15B—H15B | 120.500  |
| C9A—N8A—<br>C7A   | 101.8(6) | C16B—C15B—H15B | 120.500  |
| N8A—C9A—<br>N5A   | 110.5(6) | C17B—C16B—C15B | 121.7(6) |

|                      |          |                     |           |
|----------------------|----------|---------------------|-----------|
| N8A—C9A—<br>C10A     | 135.2(6) | C17B—C16B—Br1B      | 119.8(5)  |
| N5A—C9A—<br>C10A     | 114.3(6) | C15B—C16B—Br1B      | 118.5(5)  |
| C2A—C10A—<br>C11A    | 104.8(5) | C16B—C17B—C18B      | 119.6(6)  |
| C2A—C10A—<br>C9A     | 115.1(5) | C16B—C17B—H17B      | 120.200   |
| C11A—C10A—<br>C9A    | 140.1(6) | C18B—C17B—H17B      | 120.200   |
| N12A—C11A—<br>C10A   | 110.4(5) | C13B—C18B—C17B      | 118.9(6)  |
| N1B—C2B—<br>N3B      | 124.1(6) | F20L—C18L—F21L      | 106.8(8)  |
| C10B—C2B—<br>N3B     | 128.8(6) | F19L—C18L—F21L      | 104.7(8)  |
| C4B—N3B—<br>C2B      | 114.5(6) | F20L—C18L—C15L      | 110.9(8)  |
| N3B—C4B—<br>N5B      | 121.6(6) | F19L—C18L—C15L      | 110.9(7)  |
| N3B—C4B—<br>H4B      | 119.200  | F21L—C18L—C15L      | 115.2(7)  |
| N5B—C4B—<br>H4B      | 119.200  | O24L—C22L—O23L      | 127.5(9)  |
| C4B—N5B—<br>N6B      | 125.9(6) | O24L—C22L—C25L      | 119.2(9)  |
| C4B—N5B—<br>C9B      | 125.6(6) | O23L—C22L—C25L      | 113.3(8)  |
| N6B—N5B—<br>C9B      | 108.5(6) | C22L—O23L—H23L      | 109.500   |
| C7B—N6B—<br>N5B      | 101.3(6) | F27L—C25L—F28L      | 111.3(10) |
| N12A—N1A—C2A—<br>N3A | 176.9(6) | N6B—C7B—N8B—<br>C9B | -0.6(9)   |

|                       |           |                       |           |
|-----------------------|-----------|-----------------------|-----------|
| C13A—N1A—C2A—<br>N3A  | -0.9(11)  | C7B—N8B—C9B—<br>N5B   | 1.3(7)    |
| N12A—N1A—C2A—<br>C10A | -1.6(7)   | C7B—N8B—C9B—<br>C10B  | -179.3(8) |
| C13A—N1A—C2A—<br>C10A | -179.4(6) | C4B—N5B—C9B—<br>N8B   | 179.4(6)  |
| N1A—C2A—N3A—<br>C4A   | -177.9(6) | N6B—N5B—C9B—<br>N8B   | -1.5(8)   |
| C10A—C2A—N3A—<br>C4A  | 0.3(10)   | C4B—N5B—C9B—<br>C10B  | -0.2(9)   |
| C2A—N3A—C4A—<br>N5A   | -1.4(9)   | N6B—N5B—C9B—<br>C10B  | 178.9(6)  |
| N3A—C4A—N5A—<br>C9A   | 1.4(11)   | N1B—C2B—C10B—<br>C11B | -1.9(7)   |
| N3A—C4A—N5A—<br>N6A   | -179.7(6) | N3B—C2B—C10B—<br>C11B | 175.1(6)  |

---

**Table S2.** Hydrogen-bond geometry (Å, °)

---

| D-H...A                  | d(D-H) | d(H...A) | d(D...A)  | <(DHA) |
|--------------------------|--------|----------|-----------|--------|
| C(4A)-H(4A)...O(10L)#1   | 0.95   | 2.40     | 3.200(8)  | 142.1  |
| C(4A)-H(4A)...F(13L)#1   | 0.95   | 2.43     | 3.174(8)  | 134.8  |
| C(14A)-H(14A)...O(17L)#1 | 0.95   | 2.60     | 3.397(9)  | 142.2  |
| C(15A)-H(15A)...O(23L)#1 | 0.95   | 2.59     | 3.462(9)  | 152.4  |
| C(21A)-H(21A)...O(3L)    | 0.95   | 2.55     | 3.230(9)  | 129.1  |
| C(21A)-H(21A)...O(23L)   | 0.95   | 2.60     | 3.135(10) | 116.2  |
| N(22A)-H(22A)...O(10L)   | 0.78   | 2.02     | 2.743(7)  | 154.8  |
| C(23A)-H(23A)...O(2L)#2  | 0.95   | 2.51     | 3.354(9)  | 148.4  |
| C(24A)-H(24A)...N(8A)    | 0.95   | 2.30     | 3.177(9)  | 153.5  |
| C(4B)-H(4B)...O(24L)#3   | 0.95   | 2.64     | 3.489(10) | 149.7  |
| C(15B)-H(15B)...F(14L)#3 | 0.95   | 2.56     | 3.316(8)  | 136.3  |
| C(17B)-H(17B)...O(2L)#4  | 0.95   | 2.52     | 3.455(9)  | 169.4  |
| N(22B)-H(22B)...O(16L)   | 0.92   | 1.84     | 2.729(8)  | 160.3  |
| C(23B)-H(23B)...N(3B)#5  | 0.95   | 2.61     | 3.389(9)  | 139.3  |
| C(24B)-H(24B)...N(8B)    | 0.95   | 2.34     | 3.221(9)  | 154.0  |
| O(3L)-H(3L)...O(9L)      | 0.84   | 1.64     | 2.435(8)  | 156.2  |
| O(23L)-H(23L)...O(17L)   | 0.84   | 1.65     | 2.425(9)  | 151.5  |

---

Symmetry codes:

#1  $x-1/2, -y+1/2, z-1/2$  #2  $-x+1, -y+1, -z+1$   
#3  $x+1/2, -y+3/2, z+1/2$  #4  $x+1, y, z+1$   
#5  $x-1/2, -y+3/2, z-1/2$

**Table S3.** Crystallographic data, details of data collection and structure refinement parameters for compound **3**.

|                                                           |                                                                                                                                                                                                      |                            |                 |
|-----------------------------------------------------------|------------------------------------------------------------------------------------------------------------------------------------------------------------------------------------------------------|----------------------------|-----------------|
| formula                                                   | $C_{17}H_{11}BrN_7^+$ , $CF_3COOH$ , $CF_3COO^-$ [+ solvent]                                                                                                                                         |                            |                 |
| molecular weight                                          | 620.29 $gmol^{-1}$                                                                                                                                                                                   |                            |                 |
| absorption                                                | $\mu = 1.72\text{ mm}^{-1}$                                                                                                                                                                          |                            |                 |
| crystal size                                              | 0.11 x 0.14 x 0.17 $mm^3$ brown block                                                                                                                                                                |                            |                 |
| space group                                               | P 2 <sub>1</sub> /n (monoclinic)                                                                                                                                                                     |                            |                 |
| lattice parameters                                        | $a = 14.6974(4)\text{\AA}$                                                                                                                                                                           |                            |                 |
| (calculate from                                           | $b = 25.0001(9)\text{\AA}$                                                                                                                                                                           | $\beta = 115.489(2)^\circ$ |                 |
| 12243 reflections with                                    | $c = 15.1766(5)\text{\AA}$                                                                                                                                                                           |                            |                 |
| $2.56^\circ < \theta < 28.17^\circ$ )                     | $V = 5033.7(3)\text{\AA}^3$                                                                                                                                                                          | $z = 8$                    | $F(000) = 2464$ |
| temperature                                               | $-80^\circ\text{C}$                                                                                                                                                                                  |                            |                 |
| density                                                   | $d_{\text{xray}} = 1.637\text{ gcm}^{-3}$                                                                                                                                                            |                            |                 |
| <u>data collection</u>                                    |                                                                                                                                                                                                      |                            |                 |
| diffractometer                                            | STOE IPDS 2T                                                                                                                                                                                         |                            |                 |
| radiation                                                 | Mo- $K_\alpha$ Graphitmonochromator                                                                                                                                                                  |                            |                 |
| Scan – type                                               | $\omega$ scans                                                                                                                                                                                       |                            |                 |
| Scan – width                                              | $1^\circ$                                                                                                                                                                                            |                            |                 |
| scan range                                                | $2^\circ \leq \theta < 28^\circ$                                                                                                                                                                     |                            |                 |
|                                                           | $-19 \leq h \leq 19$ $-33 \leq k \leq 28$ $-20 \leq l \leq 20$                                                                                                                                       |                            |                 |
| number of reflections:                                    |                                                                                                                                                                                                      |                            |                 |
| measured                                                  | 26865                                                                                                                                                                                                |                            |                 |
| unique                                                    | 12502 ( $R_{\text{int}} = 0.0568$ )                                                                                                                                                                  |                            |                 |
| observed                                                  | 6103 ( $ F /\sigma(F) > 4.0$ )                                                                                                                                                                       |                            |                 |
| <u>data correction, structure solution and refinement</u> |                                                                                                                                                                                                      |                            |                 |
| corrections                                               | Lorentz and polarisation correction.                                                                                                                                                                 |                            |                 |
| Structure solution                                        | Program: SHELXT-2014                                                                                                                                                                                 |                            |                 |
| refinement                                                | Program: SHELXL-2018 (full matrix). 705 refined parameters, weighting scheme:                                                                                                                        |                            |                 |
|                                                           | $w = 1/[\sigma^2(F_o^2) + (0.0767 \cdot P)^2 + 20.39 \cdot P]$                                                                                                                                       |                            |                 |
|                                                           | with $(\text{Max}(F_o^2, 0) + 2 \cdot F_c^2)/3$ . H-atoms at calculated positions and refined with isotropic displacement parameters, NH's and OH's localized, non H- atoms refined anisotropically. |                            |                 |
| R-values                                                  | $wR2 = 0.2387$ ( $R1 = 0.0851$ for observed reflections, 0.2387 for all reflections)                                                                                                                 |                            |                 |
| goodness of fit                                           | $S = 1.019$                                                                                                                                                                                          |                            |                 |
| maximum deviation of parameters                           | 0.001 * e.s.d                                                                                                                                                                                        |                            |                 |

maximum peak height in  
diff. Fourier synthesis  
Remark

0.61, -0.49 eÅ<sup>-3</sup>

crystal structure contains a void filled with solvent  
which could not be located → SQUEEZE was used

---

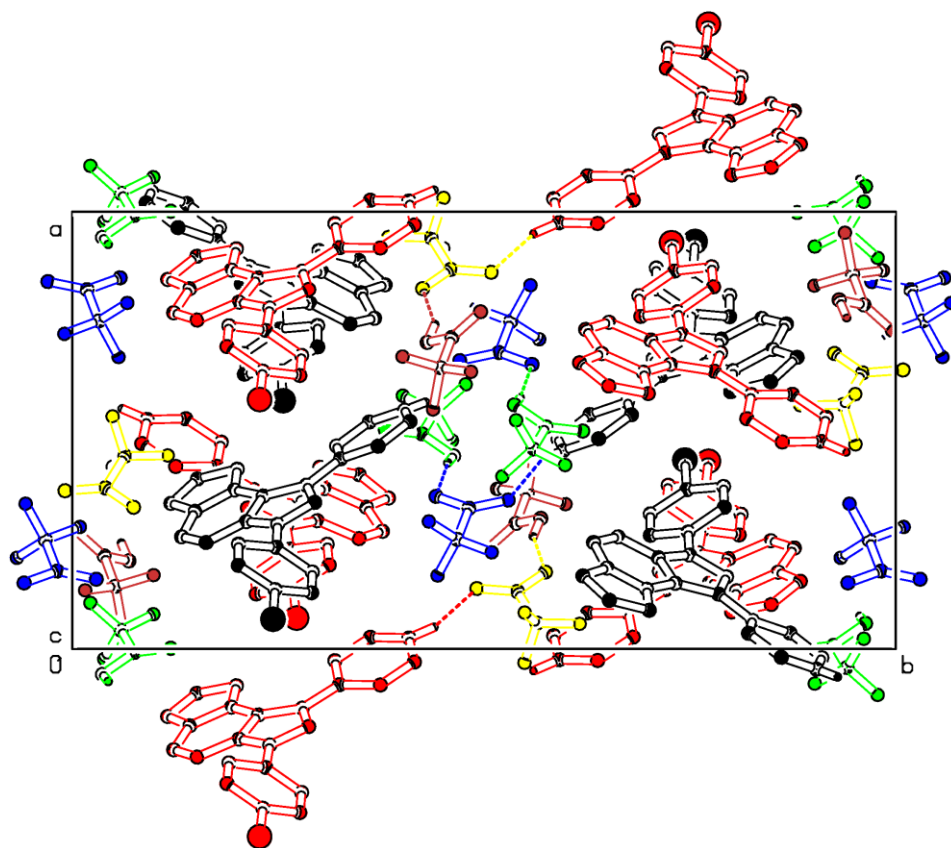

**Figure S1.** Three-dimensional supramolecular network derived from intramolecular interactions of compound **3**.



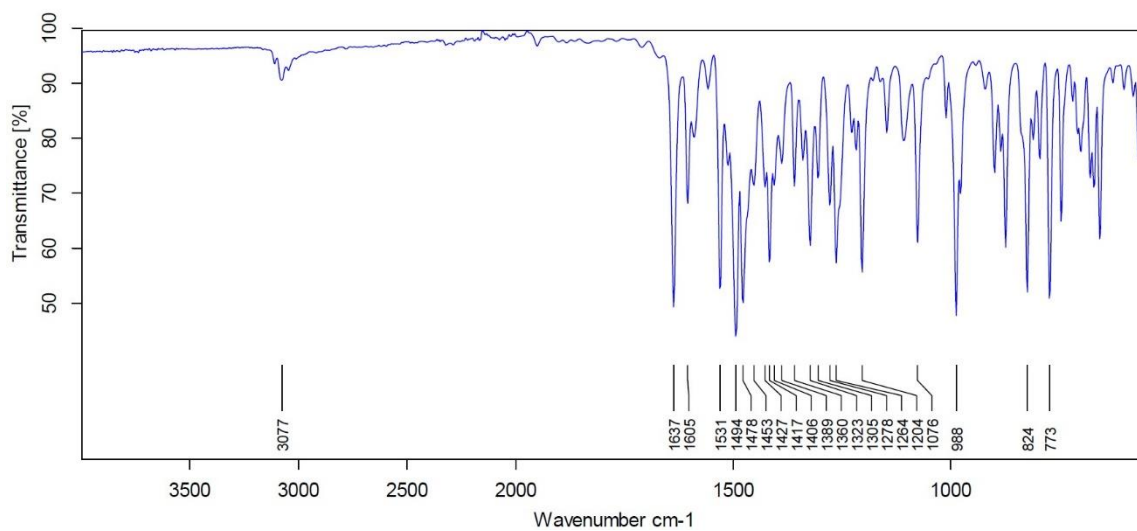

**Figure S2.** IR spectrum of compound 1.

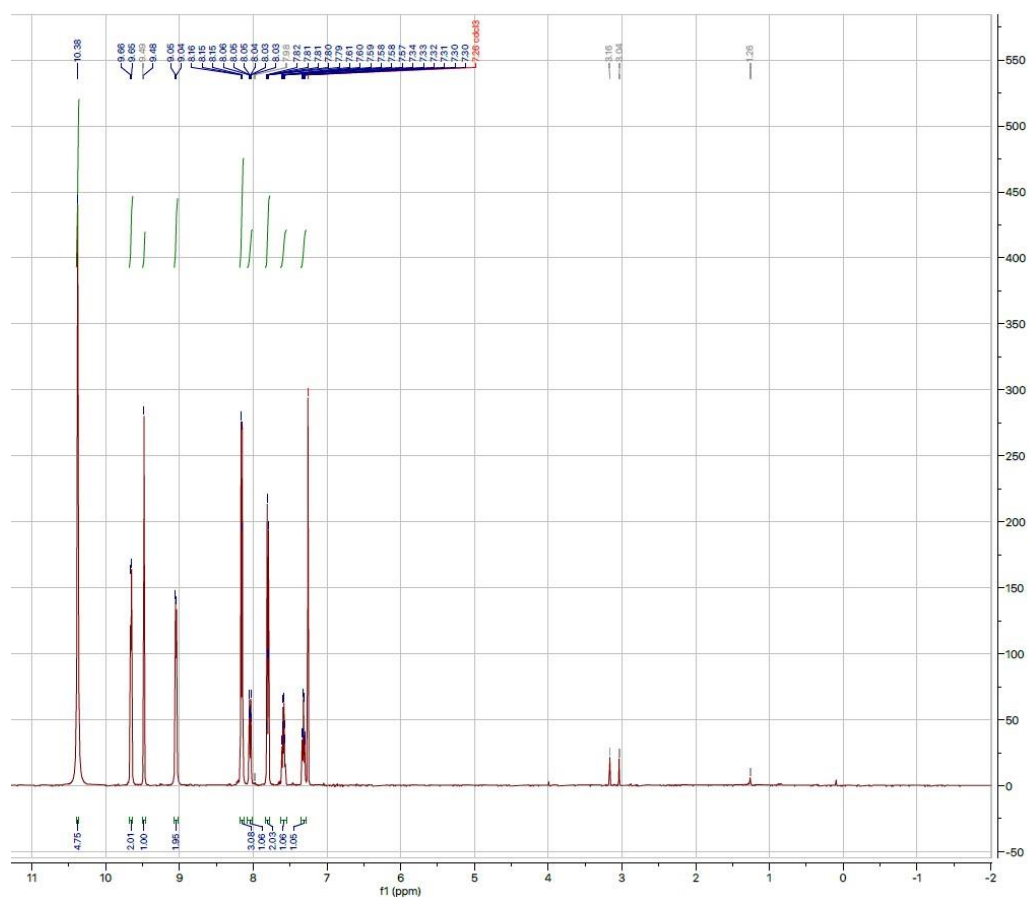

**Figure S3.** <sup>1</sup>H NMR spectrum of compound 1.

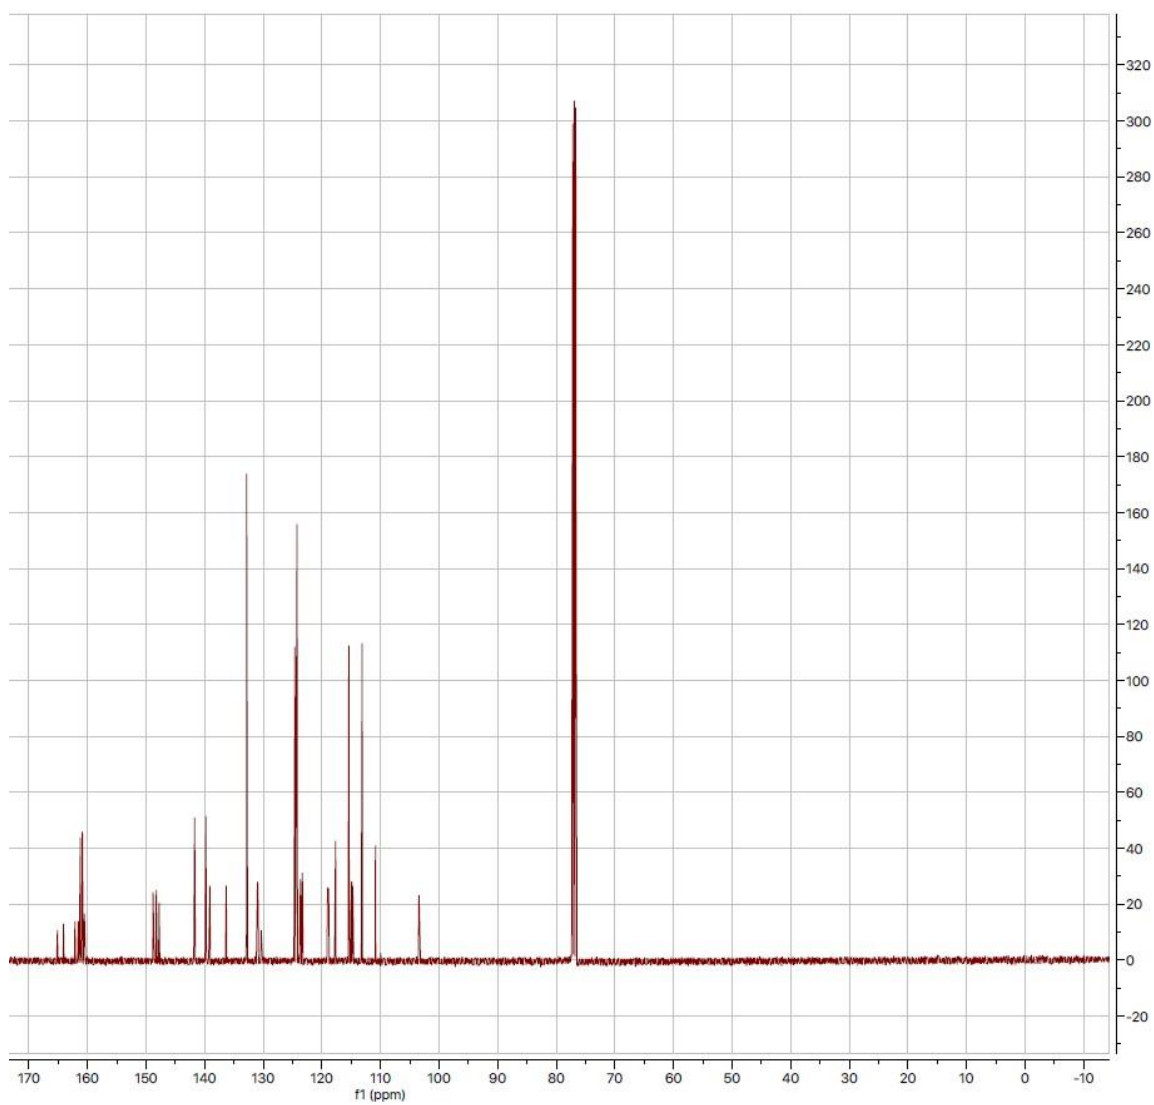

**Figure S4.**  $^{13}\text{C}$  NMR spectrum of compound 1.

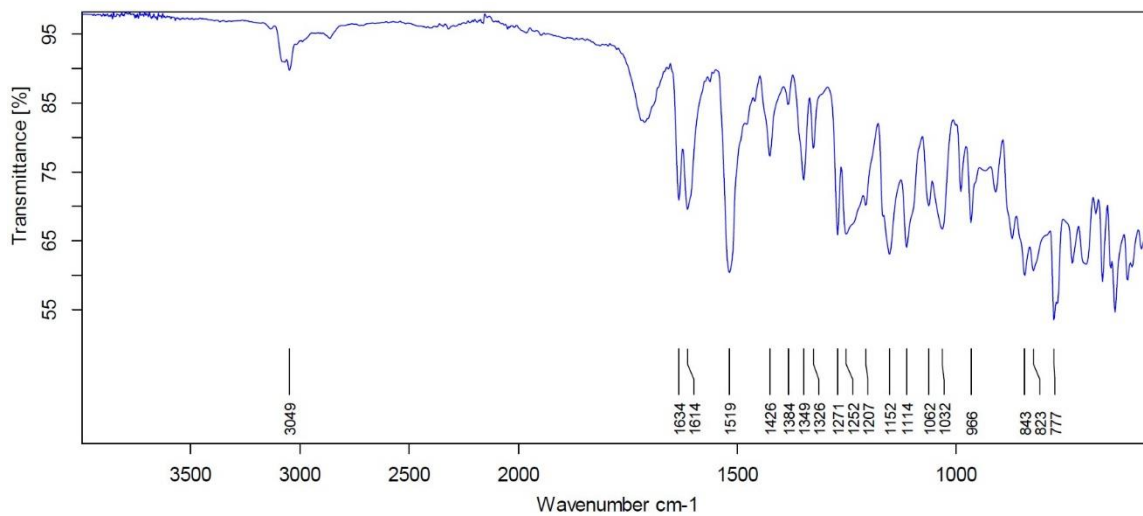

**Figure S5.** IR spectrum of compound 2.

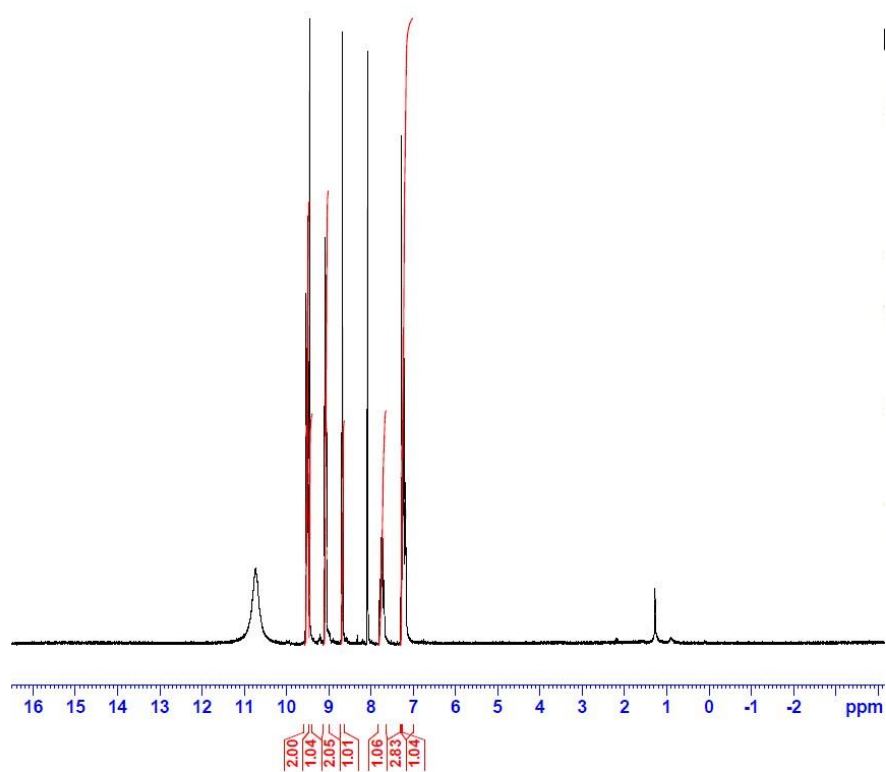

**Figure S6.** <sup>1</sup>H NMR spectrum of compound 2.

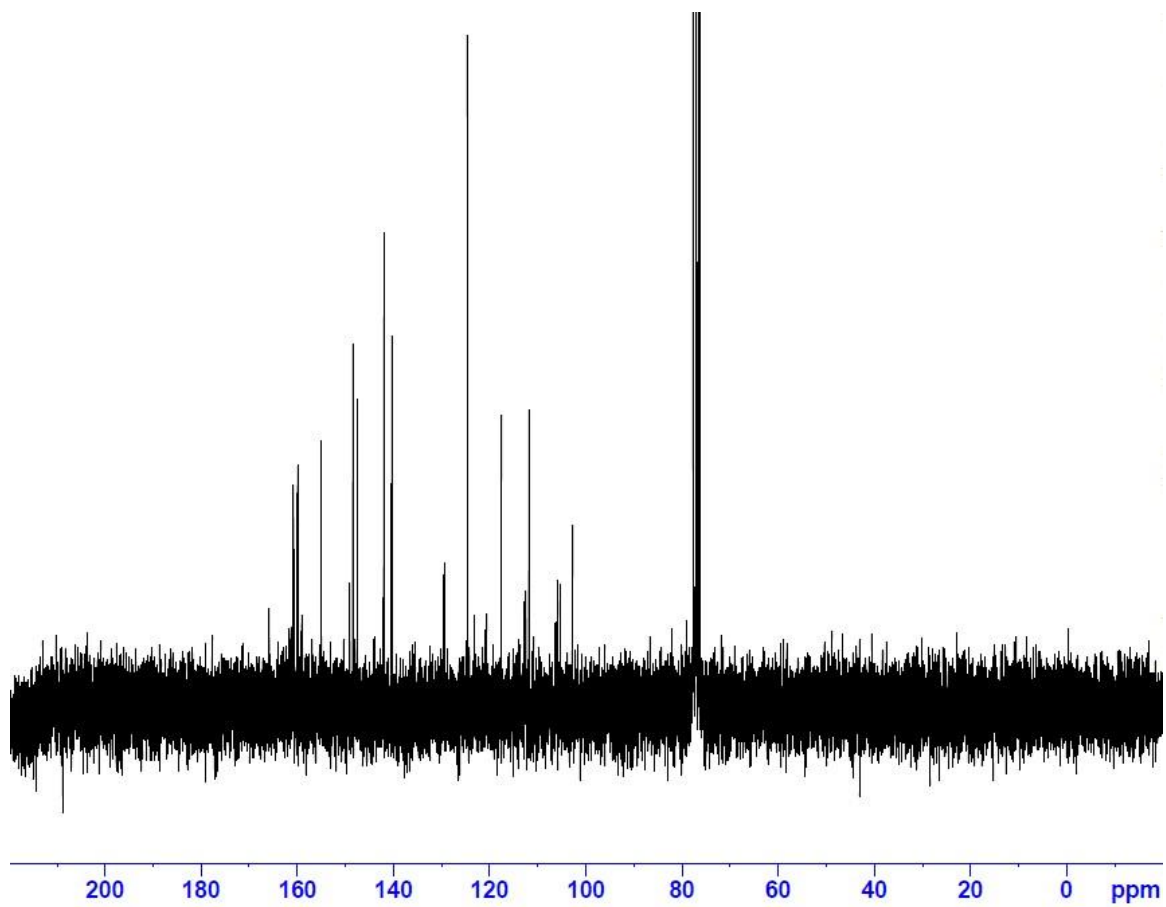

**Figure S7.**  $^{13}\text{C}$  NMR spectrum of compound 2.

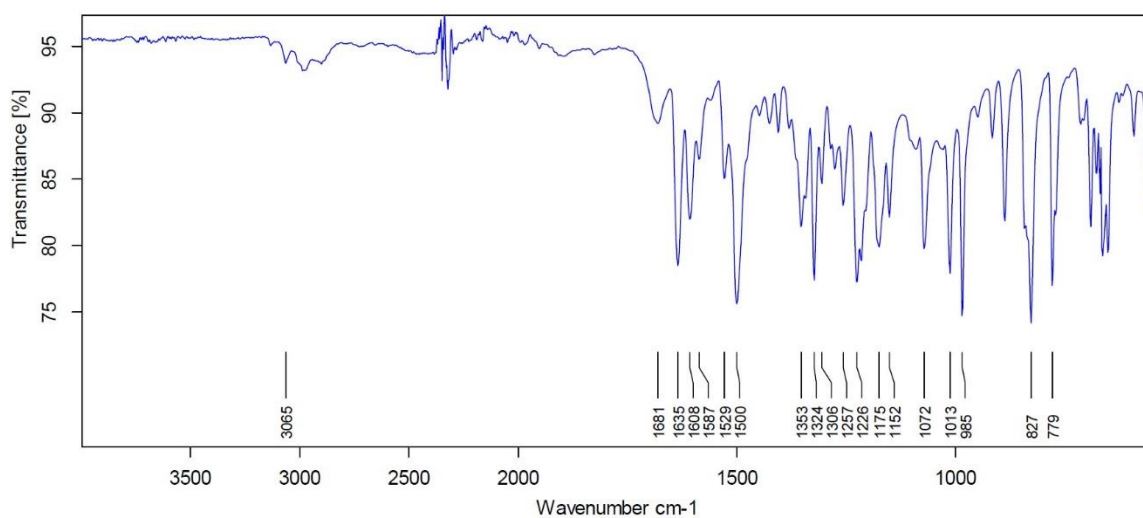

**Figure S8.** IR spectrum of compound 3.

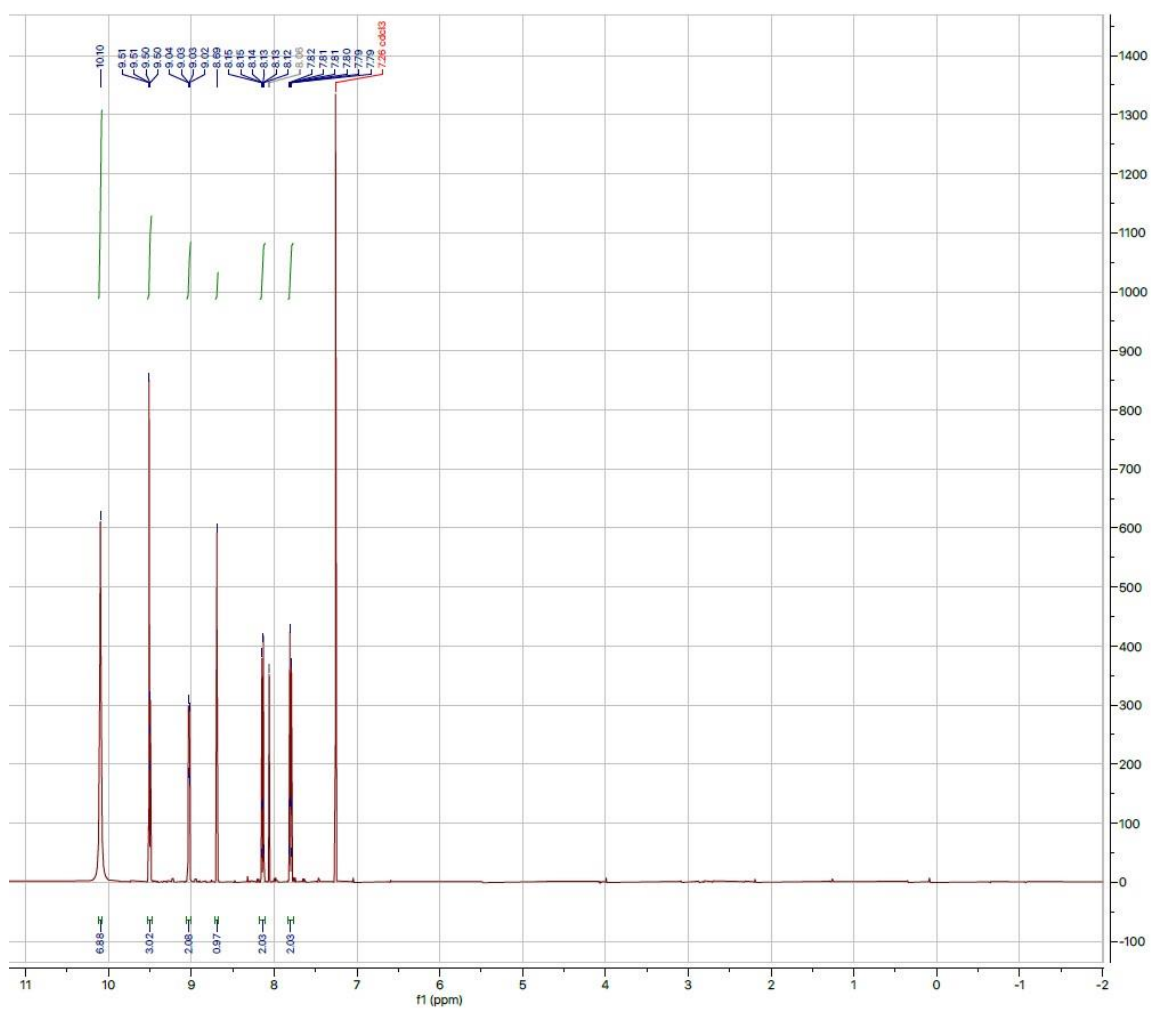

**Figure S9.** <sup>1</sup>H NMR spectrum of compound 3.

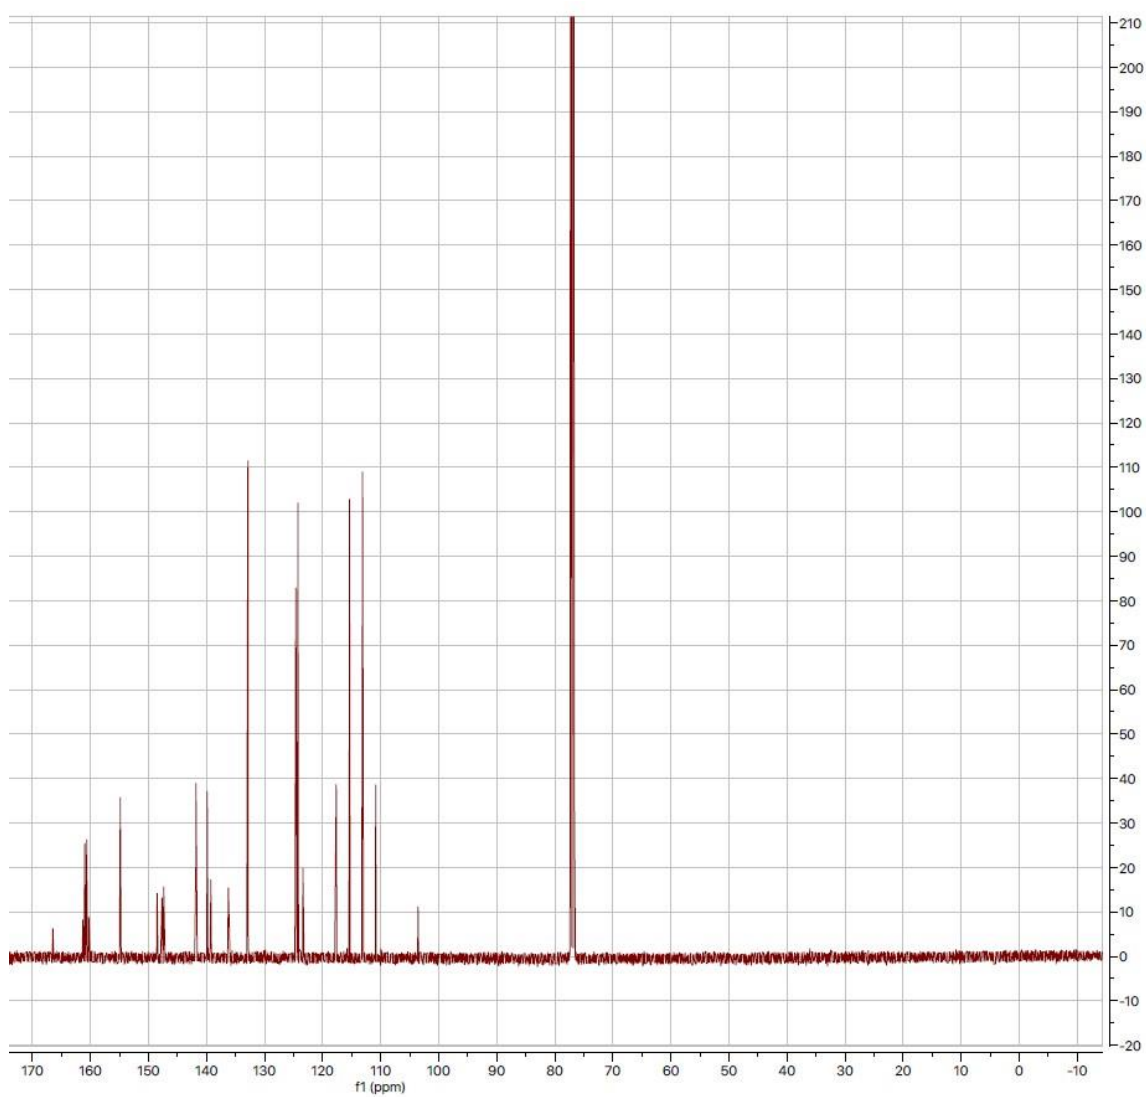

**Figure S10.**  $^{13}\text{C}$  NMR spectrum of compound 3.
